# Supplementary material
Source: Research Square preprint supplement (doi:10.21203/rs.3.rs-9243563/v1)
Supplement: Supplementary file 1 [file 0fa2a8f754c55a5adf380828.docx]

**Genetic Polymorphisms Associated with Non-Contact Muscle Injuries and Exercise-Induced Muscle Damage: A Systematic Review**

**Running title**: SNPs' effect on EIMD and muscle injury

**Journal**: Sports Medicine, Springer Nature Link

Etienne Delforge1,2, Julien Boissière1, Alexis Guerrero--Méral1, Gérard Dine3, David Laplaud2, Frédéric Nicolas Daussin1,4

1 Univ. Lille, Univ. Artois, Univ. Littoral Côte d’Opale, ULR 7369 - URePSSS - Unité de Recherche Pluridisciplinaire Sport Santé Société, F-59000 Lille, France.

2 Pôle Scientifique, Medinetic Learning, F-75008 Paris, France.

3 IBT Technopole CS 90601, 2 rue Gustave Eiffel 10901 Troyes Cedex, France.

4 Univ. Lille, lnserm, CHU Lille, JUNIA, U1352 - BioPrev - Bien vieillir: de l'inflammaging à la prévention, 59000, Lille, France.

**Corresponding author**: Frédéric N. Daussin, University of Lille, Pôle Recherche, 1 place de Verdun, 59045 Lille Cedex, France, tel: +003208887369, email: [frederic.daussin@univ-lille.fr](mailto:frederic.daussin@univ-lille.fr)

**ORCID**: E. Delforge 0000-0002-4235-2966, J. Boissière 0000-0001-8337-8508, A. Guerrero--Méral 0009-0002-9154-331X, G. Dine 0000-0002-4123-305X, D. Laplaud 0009-0000-0354-6613, F.N. Daussin 0000-0002-4168-0044

**Supplementary Material**

Table S1 Details of the filters and limits used throughout the electronic search

| Source | Filters and limits |
| --- | --- |
| *PubMed* | 1st run on 18 November 2024: no filter  2nd run on 20 November 2025: filter by date to find records published from the 1st run |
| *Web of Science* | 1st run: *a priori* duplicate removal based on *PubMed*’s *PMID* records  2nd run: as 1st and a filter by date to find records published from the 1st run |
| *Embase* | 1st run: *a priori* duplicate removal based on *PubMed*’s PMID records and a filter to delete the records from the conference abstracts category  2nd run: as 1st and a filter by date to find records published from the 1st run |
| *Google Scholar* | 1st run: records selection was limited to the first 200  2nd run: records selection was limited to the first 100. The year was set at 2025 |

| **Gene** | **ID variation** | **ID chrom:pos:ref:alt** | **Gene** | **ID variation** | **ID chrom:pos:ref:alt** |
| --- | --- | --- | --- | --- | --- |
| ACAN | *rs1516797* | chr15:88867083:T:G | CCR2 | *rs768539* | chr3:46350774:A:G,T |
| ACE | *I/D* | chr17:63488670:G:A,T | CKM | *rs1803285* | chr19:45317959:C:G,T |
| ACTN3 | *rs1815739* | chr11:66560624:C:A,T | CKM | *rs8111989* | chr19:45305950:T:C |
| ADAM12 | *rs3740199* | chr10:126330456:C:A,G,T | COL12A1 | *rs970547* | chr6:75087586:C:A,G,T |
| ADAMTS14 | *rs4747096* | chr10:70758253:A:G,T | COL1A1 | *rs1107946* | chr17:50203629:A:C,G |
| ADAMTS2 | *rs1054480* | chr5:179113974:G:A | COL1A1 | *rs1800012* | chr17:50200388:C:A,G |
| ADAMTS5 | *rs226794* | chr21:26930036:A:G,T | COL22A1 | *rs11784270* | chr8:138908388:A:C |
| AGT | *rs699* | chr:1:230710048:A:C,G,T | COL22A1 | *rs6577958* | chr8:138903960:T:C |
| AMPD1 | *rs17602729* | chr1:114693436:G:A,C,T | COL5A1 | *rs12722* | chr9:134842570:C:G,T |
| BDKRB2 | *rs5810761* | No data* | COL5A1 | *rs16399* | chr9:134843389:ATCTATCT:-,ATCT,ATCTATCTATCT |
| CASP8 | *rs1045485* | chr2:201284866:G:A,C,T | COL5A1 | *rs3196378* | chr9:134843036:C:A,G,T |
| CASP8 | *rs3834129* | chr2:201232809:AGTAAG:- | DCN | *rs516115* | chr12:91163515:T:C,G |
| CAT | *rs769214* | chr:11:34438170:G:A | DES | *rs58999456* | chr2:219418467:G:A,T |
| CAT | *rs7943316* | chr11:34438925:A:T | DES | *rs60794845* | chr2:219418599:C:A,G,T |
| CCDC73 | *rs78405694* | chr11:32698540:T:C,G | ELN | *rs2071307* | chr7:74056384:G:A,C |
| CCL2 | *rs1024610* | chr17:34253212:T:A,G | EMILIN1 | *rs2289360* | chr2:27079297:T:A,C,G |
| CCL2 | *rs1024611* | chr17:34252769:A:G | ESR1 | *rs2234693* | chr6:151842200:T:C,G |
| CCL2 | *rs13900* | chr17:34256892:C:A,G,T | ESR1 | *rs9340799* | chr6:151842246:A:G |
| CCL2 | *rs17652343* | chr17:34245836:A:G | GDF5 | *rs143383* | chr20:35438203:G:A,C,T |
| CCL2 | *rs1860189* | chr17:34251339:A:G | GPX1 | *rs1050450* | chr3:49357401:G:A,C,T |
| CCL2 | *rs2857654* | chr17:34252512:C:A,G,T | GPX1 | *rs1800668* | chr3:49358324:G:A |
| CCL2 | *rs2857656* | chr17:34254988:G:A,C | GSTM1 | *1p13.3* | No data* |
| CCL2 | *rs2857657* | chr17:34256113:G:C,T | GSTT1 | *22q11.2* | No data* |
| CCL2 | *rs3760396* | chr17:34254422:G:C,T | HGF | *rs1011694* | chr7:81703677:T:A,C,G |
| CCL2 | *rs3917878* | chr17:34251836:C:T | HGF | *rs5745678* | chr7:81742731:A:C,G,T |
| CCL2 | *rs4586* | chr17:34256250:T:A,C | HGF | *rs5745697* | chr7:81728033:T:A,C,G |
| CCR2 | *rs17141010* | chr3:46350569:C:A,T | HIF1A | *rs11549465* | chr14:61740839:C:T |
| CCR2 | *rs1799864* | chr3:46357717:G:A,T | HP | *16q22.1* | No data* |
| CCR2 | *rs1799865* | chr3:46358307:T:C | IGF1 | *rs35767* | chr12:102481791:A:C,G,T |
| CCR2 | *rs3918358* | chr3:46352928:C:A,G,T | IGF2 | *rs2230949* | chr11:2132958:G:A,C |

Table S2 SNPs’ ID based on chromosome, variation’s position, and reference and alternative alleles

| **Gene** | **ID variation** | | **ID chrom:pos:ref:alt** | | **Gene** | | **ID variation** | | **ID chrom:pos:ref:alt** | |
| --- | --- | --- | --- | --- | --- | --- | --- | --- | --- | --- |
| IGF2 | *rs3213216* | chr11:2136949:T:A,C,G | | MYLK | | *rs2700352* | | chr3:123831616:G:A,C | |
| IGF2 | *rs3213220* | chr11:2135899:A:G | | MYLK | | *rs28497577* | | chr3:123793780:G:A,T | |
| IGF2 | *rs3213221* | chr11:2135814:C:A,G,T | | No data | | *rs12807854* | | chr11:124066891:T:C | |
| IGF2 | *rs680* | chr11:2132404:T:A,C,G | | NOGGIN | | *rs1372857* | | chr17:56603681:C:A,T | |
| IGF2AS | *rs4244808* | chr11:2141880:T:A,G | | NOS3 | | *rs1799983* | | chr7:150999023:T:A,G | |
| IGF2AS | *rs7924316* | chr11:2152217:T:C,G | | PON1 | | *rs662* | | chr7:95308134:T:A,C,G | |
| IGFBP3 | *rs2132570* | chr7:45922864:T:A,C,G | | PPARA | | *rs4253778* | | chr22:46234737:G:C,T | |
| IGFBP3 | *rs6670* | chr7:45912655:T:A | | SLC26A10 | | *rs11613457* | | chr12:57618450:G:A | |
| IL1A | *+4845, G/T* | No data* | | SLC30A8 | | *rs13266634* | | chr8:117172544:C:A,T | |
| IL1A | *rs1800587* | chr2:112785383:G:A,C,T | | SMAD6 | | *rs2053423* | | chr15:66733879:C:T | |
| IL1B | *+3954, C/T* | No data* | | SOD2 | | *rs4880* | | chr6:159692840:A:C,G,T | |
| IL1B | *−3737, C/T* | No data* | | SOD3 | | *rs1799895* | | chr4:24800212:C:G,T | |
| IL1B | *−511, C/T* | No data* | | SOX15 | | *rs142927895* | | chr4:161070644:A:G | |
| IL1B | *rs1143634* | chr2:112832813:G:A,C,T | | SOX15 | | *rs4227* | | chr17:7587859:G:A,T | |
| IL1RN | *+2018, T/C* | No data* | | SPP1 | | *rs28357094* | | chr4:87975645:T:G | |
| IL6 | *rs1800795* | chr7:22727026:C:G,T | | TIMP2 | | *rs4789932* | | chr17:78928193:G:A,C | |
| IL6R | *rs2228145* | chr1:154454494:A:C,T | | TNC | | *rs2104772* | | chr9:115046506:T:A,C | |
| INS | *rs3842748* | chr11:2160165:C:G,T | | TNF | | *rs1800629* | | chr6:31575254:G:A | |
| LIF | *rs737812* | chr:22:30243121:C:A,G | | TRIM63 | | *rs2275950* | | chr1:26058512:T:A,C,G | |
| LIF | *rs929271* | chr22:30242237:T:G | | TTN | | *89464A>G* | | No data* | |
| LIN28A | *rs6598964* | chr1:26419836:A:G | | TTN | | *rs1001238* | | chr2:178599800:T:A,C | |
| MCT1 | *rs1049434* | chr1:112913924:A:G,T | | TTN | | *rs2742327* | | chr2:178722960:T:C | |
| MMP1 | *rs1799750* | ch11:102799765:C:- | | UCP1 | | *rs1800592* | | chr4:140572807:T:A,C,G | |
| MMP12 | *rs2276109* | chr11:102875061:T:A,C,G | | UCP2 | | *rs659366* | | chr11:73983709:C:T | |
| MMP3 | *rs522616* | chr11:102844317:T:A,C,G | | UCP3 | | *rs1800849* | | chr11:74009120:G:A,C,T | |
| MMP3 | *rs591058* | chr11:102840607:T:A,C | | VDR | | *rs10735810* | | No data* | |
| MMP3 | *rs650108* | chr11:102838056:G:A,T | | VDR | | *rs1544410* | | chr12:47846052:C:A,G,T | |
| MMP3 | *rs679620* | chr11:102842889:T:A,C,G | | VDR | | *rs2228570* | | chr12:47879112:A:C,G,T | |
| MSTN | *rs1805086* | chr2:190060351:T:A,C,G | | VDR | | *rs7975232* | | chr12:47845054:C:A | |
| MYF5 | *rs1163263* | chr12:80720051:A:C,G | | VEGFA | | *rs2010963* | | chr6:43770613:C:G,T | |

Table S2 SNPs’ ID based on chromosome, variation’s position, and reference and alternative alleles (continued)

***: available in *GRCh38; Alt,* alternative; *Chrom,* chromosome; *Pos,* position; *Ref,* reference.
