# Supplementary material
Source: Research Square preprint supplement (doi:10.21203/rs.3.rs-9243563/v1)
Supplement: Supplementary file 2 [file a664e4a0eb89c72fba9f68ad.docx]

Table 1 Description of the PICOTS’ characteristics of the systematic review

| Population | Healthy women and men, 18 – 40 years old (for the majority of study participants) |
| --- | --- |
| Intervention | Original study with any exposure involving physical activity |
| Comparators | SNPs |
| Outcomes | Each data related to: muscle damage biomarkers or inflammatory biomarkers or NCMI. Each performance measurement and self-reported data were also recorded as complementary outcomes |
| Timing | Outcomes measured after an acute exposure |
| Settings | SNPs’ effect (protective, deleterious, or ineffective) on the outcomes |

*SNPs,* single-nucleotide polymorphisms; *NCMI,* non-contact muscle injury.

Table 2 SNPs related to enzymes and metabolic regulators of muscle

| Gene | ID variation | Analysis | Ref | Pop | Age* | Sport | Level | Intervention | Significance of the SNP effect on the outcomes | Risk of bias** |
| --- | --- | --- | --- | --- | --- | --- | --- | --- | --- | --- |
| ACE | *I/D* | Biological | [86] | 60 ♂ 28 ♀ | 29 | Physically active participants | Untrained | Stepping up and down two stairs for five min, followed by 15 knee bends completed within one min with a backpack weighted at 30 % of the participant's body weight | CK: ∅ | 3 |
| ACE | *I/D* | Biological | [87] | 82 ♂ 53 ♀ | 15 – 19 (17 %) 20 – 40 (61.5 %) 41 – 58 (21.5 %) | No data | Trained | Free choice of running distance (4 – 21 km) | CK: ∅ AST: ∅ ALT: ∅ | 3 |
| ACE | *I/D* | Biological | [35] | 64 ♂ | 28.1 | Military | Trained | A 40 km march armed and equipped (additional load of 35 kg) | CK: ∅ *II-ID vs.DD*, but *II-ID > DD* at baseline LDH: ∅ AST: ∅ *II-ID vs.DD*, but *II-ID > DD* at baseline | 1 |
| ACE | *I/D* | Biological | [36] | 42 ♂ 28 ♀ | 25 | Physically active participants | Trained | 50 maximal eccentric contractions of the elbow flexors | CK: *II-ID > DD* | 1 |
| ACE | *I/D* | Biological | [37] | 81 ♂ | 39 | Endurance runner | Trained | Marathon | Troponin: *II > DD* Pro BNP: *II > DD*  IL8: *II > DD* IL1β, IL6, IL-12p70, and IL10: ∅  LDH: *II > DD* CK: *II > DD* CK-MB: ∅ Mb: ∅ AST: *II > DD* after race, but *DD > II* 1 and 3 days after ALT: *DD > II* TNFα: ∅ | 1 |
| ACE | *I/D* | Injury | [88] | 99 ♀ | 19.7 | Various | Trained | Injury history determined by questionnaire | Injury incidence: genotype effect | 3 |

Table 2 SNPs related to enzymes and metabolic regulators of muscle (continued)

| Gene | ID variation | Analysis | Ref | Pop | Age* | Sport | Level | Intervention | Significance of the SNP effect on the outcomes | Risk of bias** |
| --- | --- | --- | --- | --- | --- | --- | --- | --- | --- | --- |
| ACE | *I/D* | Injury | [38] | 341 ♂ (Italy) 369 ♂ (Japan) | Italy: 19.9 Japan: 20.8 | Football | Elite | Eight-year follow-up in an Italian cohort and questionnaire in a Japanese cohort | Injury incidence: ∅ Italian but *II > DD-ID* in Japanese and combined Injury severity: ∅ Italian, Japanese, and combined | 1 |
| ACE | *I/D* | Injury | [15] | 64 ♂ | 23.1 | Football | Elite | 10 years of training and competitions follow-up | Injury incidence: *II-ID > DD* Injury severity: ∅ | 1 |
| ACE | *I/D* | Injury | [39] | 168 ♀ | 23.3 | Football | Trained | One season of training and competitions follow-up | Injury incidence: ∅ | 1 |
| ACE | *I/D* | Injury | [14] | 107 ♂ | 20 | Football | Elite | Six seasons of training and competitions, hamstring injuries follow-up | Injury incidence: ∅ Acute injury: ∅ Overuse injury: ∅ Severe injury: ∅ Recurrent injury: ∅ | 1 |
| ACE | *I/D* | Injury | [11] | 83 ♂ | *II*: 28 *ID*: 25 *DD*: 24 | Football | Elite | Three seasons follow-up | Injury incidence: *II > ID-DD* Severe injury: *DD > DI-II* (*P* = 0.06) | 2 |
| ACE | *I/D* | Injury | [89] | 200 ♂ | > 18 | Rugby | Elite | Medical history and injury data | Injury incidence: ∅ | 2 |
| AGT | *rs699* | Biological | [35] | 64 ♂ | 28.1 | Military | Trained | A 40 km march armed and equipped (additional load of 35 kg) | CK: ∅ LDH: ∅ AST: ∅ | 1 |
| AGT | *rs699* | Biological | [37] | 81 ♂ | 39 | Endurance runner | Trained | Marathon | Troponin: *MM > TT* Pro BNP: *MM > TT* IL1β and IL8 : *MM > TT* IL6, IL-12p70, and IL10: ∅ LDH: ∅ CK and CK-MB: ∅ Mb: ∅ AST and ALT: *MM > TT* TNFα: ∅ | 1 |

Table 2 SNPs related to enzymes and metabolic regulators of muscle (continued)

| Gene | ID variation | Analysis | Ref | Pop | Age* | Sport | Level | Intervention | Significance of the SNP effect on the outcomes | Risk of bias** |
| --- | --- | --- | --- | --- | --- | --- | --- | --- | --- | --- |
| AMPD1 | *rs17602729* | Injury | [39] | 168 ♀ | 23.3 | Football | Trained | One season of training and competitions follow-up | Injury incidence: ∅ | 1 |
| BDKRB2 | *rs5810761* | Biological | [37] | 81 ♂ | 39 | Endurance runner | Trained | Marathon | Troponin: *-9-9* > *+9+9* Pro-BNP: ∅ IL1β, IL-12p70, and IL10: ∅ IL6 and IL8: -*9-9* > *+9+9* LDH: *-9-9 > +9+9* CK and CK-MB: *-9-9 > +9+9* Mb: *-9-9 > +9+9* AST and ALT: *+9+9 > -9-9* TNFα: ∅ | 1 |
| CASP8 | *rs1045485* | Injury | [14] | 107 ♂ | 20 | Football | Elite | Six seasons of training and competitions, hamstring injuries follow-up | Injury incidence: ∅ Acute injury: ∅ Overuse injury: ∅ Severe injury: ∅ Recurrent injury: ∅ | 1 |
| CASP8 | *rs3834129* | Injury | [14] | 107 ♂ | 20 | Football | Elite | Six seasons of training and competitions, hamstring injuries follow-up | Injury incidence: ∅ Acute injury: ∅ Overuse injury: ∅ Severe injury: *DD-II* > *DI* Recurrent injury: ∅ | 1 |
| CKM | *rs1803285* | Biological | [86] | 60 ♂ 28 ♀ | 29 | Physically active participants | Untrained | Stepping up and down two stairs for five min, followed by 15 knee bends completed within one min with a backpack weighted at 30 % of the participant's body weight | ↑ CK high responders *AA* *vs*. *AG*-*GG* | 3 |
| CKM | *rs1803285* | Biological | [43] | 44 ♂ | 19 | Football | Elite | 45 min of training consisting of five stations with intermittent exercises | CK: ∅ CRP: ∅ TNFα: ∅ IL6: ∅ | 1 |
| CKM | *rs8111989* | Biological | [49] | 42 ♂ 28 ♀ | 25 | Physically active participants | Trained | 50 maximal eccentric contractions of the elbow flexors | CK: ∅ | 1 |

Table 2 SNPs related to enzymes and metabolic regulators of muscle (continued)

| Gene | ID variation | Analysis | Ref | Pop | Age* | Sport | Level | Intervention | Significance of the SNP effect on the outcomes | Risk of bias** |
| --- | --- | --- | --- | --- | --- | --- | --- | --- | --- | --- |
| CKM | *rs8111989* | Injury | [50] | 109 ♂ | *AA*: 22.8 *GA*: 23.9 *GG*: 23.1 | Football | Elite | One season of training and competitions follow-up | Players' frequency of sustaining an injury: ∅ Injury incidence (match, training, or combine): ∅ Injury number/player and location: ∅ Injury recurrence: *GG-GA > AA* Slight injury: *GG > AA-GA* Moderate injury: *AA-AG > GG* Muscle tears: *GA > AA-GG* Muscle contracture: *GG > AA-GA* Muscle injury becomes a tear: *GA-AA > GG* | 1 |
| CKM | *rs8111989* | Injury | [39] | 168 ♀ | 23.3 | Football | Trained | One season of training and competitions follow-up | Injury incidence: ∅ | 1 |
| HIF1A | *rs11549465* | Biological | [43] | 44 ♂ | 19 | Football | Elite | 45 min of training consisting of five stations with intermittent exercises | CK: ∅ CRP: ∅ TNFα: ∅ IL6: ∅ | 1 |
| HIF1A | *rs11549465* | Injury | [14] | 107 ♂ | 20 | Football | Elite | Six seasons of training and competitions, hamstring injuries follow-up | Injury incidence: *CC > CT* Acute injury: ∅ Overuse injury: ∅ Severe injury: ∅ Recurrent injury: ∅ | 1 |
| MCT1 | *rs1049434* | Injury | [15] | 64 ♂ | 23.1 | Football | Elite | 10 years of training and competitions follow-up | Injury incidence: ∅  Injury severity: ∅ | 1 |
| MCT1 | *rs1049434* | Injury | [51] | 173 ♂ | 19.4 | Football | Elite | Five seasons of training and competitions follow-up | Injury incidence: *AA > TT* Injury severity: ∅ Recovery time: ∅ | 1 |
| MCT1 | *rs1049434* | Injury | [89] | 200 ♂ | > 18 | Rugby | Elite | Medical history and injury data | Injury incidence: ∅ | 2 |

Table 2 SNPs related to enzymes and metabolic regulators of muscle (continued)

| Gene | ID variation | Analysis | Ref | Pop | Age* | Sport | Level | Intervention | Significance of the SNP effect on the outcomes | Risk of bias** |
| --- | --- | --- | --- | --- | --- | --- | --- | --- | --- | --- |
| NOS3 | *rs1799983* | Injury | [14] | 107 ♂ | 20 | Football | Elite | Six seasons of training and competitions, hamstring injuries follow-up | Injury incidence: *G > T* Acute injury: ∅ Overuse injury: ∅ Severe injury: ∅ Recurrent injury: ∅ | 1 |
| PPARA | *rs4253778* | Biological | [63] | 47 ♂ | 35.2 | Endurance runner | Trained | Time to exhaustion running test on a treadmill with a speed set at 80 % of VO2max | CK: ∅ LDH: ∅ | 1 |
| SLC26A10 | *rs11613457* | Biological | [43] | 44 ♂ | 19 | Football | Elite | 45 min of training consisting of five stations with intermittent exercises | CK: ∅ CRP: ∅ TNFα: ∅ IL6: ∅ | 1 |
| SLC26A10 | *rs11613457* | Injury | [46] | 74 ♂ | 19 – 35 | Football | Elite | Five seasons follow-up | Injury incidence: ∅ Injury severity: ∅ Time to recover: *GA > GG* | 1 |
| SLC30A8 | *rs13266634* | Biological | [43] | 44 ♂ | 19 | Football | Elite | 45 min of training consisting of five stations with intermittent exercises | CK: ∅ CRP: *TT > TC-CC* TNFα: ∅ IL6: ∅ | 1 |
| SLC30A8 | *rs13266634* | Biological | [52] | 78 ♂ 78 ♀ | 24.5 | No data | Untrained | 50 maximal eccentric contractions of the elbow flexors | CK ♂: *CC-CT > TT* Mb ♂: *CC-CT > TT* Strength loss ♂: *CC-CT > TT* Muscle soreness ♂: *CC-CT > TT* | 1 |
| SOX15 | *rs142927895* | Injury | [45] | 73 ♂ | No data | Football | Elite | Three seasons follow-up | Injury among white participants: ∅ Injury among hispanic participants: ∅ Injury among black participants: ∅ | 1 |

Table 2 SNPs related to enzymes and metabolic regulators of muscle (continued)

| Gene | ID variation | Analysis | Ref | Pop | Age* | Sport | Level | Intervention | Significance of the SNP effect on the outcomes | Risk of bias** |
| --- | --- | --- | --- | --- | --- | --- | --- | --- | --- | --- |
| SOX15 | *rs4227* | Biological | [43] | 44 ♂ | 19 | Football | Elite | 45 min of training consisting of five stations with intermittent exercises | CK: ∅ CRP: ∅ TNFα: ∅ IL6: ∅ | 1 |
| SOX15 | *rs4227* | Injury | [46] | 74 ♂ | 19 – 35 | Football | Elite | Five seasons follow-up | Injury incidence: *GG > GT-TT* Injury severity: ∅ Time to recover: ∅ | 1 |
| SOX15 | *rs4227* | Injury | [14] | 107 ♂ | 20 | Football | Elite | Six seasons of training and competitions, hamstring injuries follow-up | Injury incidence: ∅ Acute injury: ∅ Overuse injury: ∅ Severe injury: ∅ Recurrent injury: ∅ | 1 |
| SOX15 | *rs4227* | Injury | [44] | 73 ♂ | 26.2 | Football | Elite | Three seasons follow-up | Injury severity: ∅ | 1 |
| TIMP2 | *rs4789932* | Injury | [14] | 107 ♂ | 20 | Football | Elite | Six seasons of training and competitions, hamstring injuries follow-up | Injury incidence: ∅ Acute injury: ∅ Overuse injury: ∅ Severe injury: ∅ Recurrent injury: ∅ | 1 |
| UCP1 | *rs1800592* | Injury | [88] | 99 ♀ | 19.7 | Various | Trained | Injury history determined by questionnaire | Injury incidence: ∅ | 3 |
| UCP2 | *rs659366* | Injury | [88] | 99 ♀ | 19.7 | Various | Trained | Injury history determined by questionnaire | Injury incidence: ∅ | 3 |
| UCP3 | *rs1800849* | Injury | [88] | 99 ♀ | 19.7 | Various | Trained | Injury history determined by questionnaire | Injury incidence: ∅ | 3 |

**,* on mean or range in years; ***,* *1* low, *2* moderate, *3* high; *∅* ,non-significant effect*;* *ALT,* alanine transaminase; *AST,* aspartate transaminase; *CK,* creatine kinase; *CRP,* C-reactive protein; *IL,* interleukin; *LDH,* lactate dehydrogenase; *MB,* muscle-brain; *Mb,* myoglobin; *Pop,* population; *Ref,* reference; *TNF*α, tumor necrosis factor-alpha.

Table 3 SNPs related to growth factors and muscle recovery regulators

| Gene | ID variation | Analysis | Ref | Pop | Age* | Sport | Level | Intervention | Significance of the SNP effect on the outcomes | Risk of bias** |
| --- | --- | --- | --- | --- | --- | --- | --- | --- | --- | --- |
| ESR1 | *rs2234693* | Injury | [13] | 870 ♂ 441 ♀ | Non-muscle injured: 20.6 Muscle injured: 20.2 | Various | Elite | Injury history determined by questionnaire | Injury history: *TT-CT > CC* | 1 |
| ESR1 | *rs9340799* | Injury | [13] | 870 ♂ 441 ♀ | Non-muscle injured: 20.6 Muscle injured: 20.2 | Various | Elite | Injury history determined by questionnaire | Injury history: ∅ | 1 |
| GDF5 | *rs143383* | Injury | [46] | 74 ♂ | 19 – 35 | Football | Elite | Five seasons follow-up | Injury incidence: ∅ Injury severity: ∅ Time to recover: ∅ | 1 |
| GDF5 | *rs143383* | Injury | [14] | 107 ♂ | 20 | Football | Elite | Six seasons of training and competitions, hamstring injuries follow-up | Injury incidence: ∅ Acute injury: ∅ Overuse injury: ∅ Severe injury: ∅ Recurrent injury: ∅ | 1 |
| HGF | *rs1011694* | Injury | [46] | 74 ♂ | 19 – 35 | Football | Elite | Five seasons follow-up | Injury incidence: *TT-AT > AA* Injury severity: *AA > TT-AT* Time to recover: ∅ | 1 |
| HGF | *rs5745678* | Injury | [46] | 74 ♂ | 19 – 35 | Football | Elite | Five seasons follow-up | Injury incidence: ∅ Injury severity: *CC > TT-TC* Time to recover: *CC > TT-TC* | 1 |
| HGF | *rs5745697* | Biological | [43] | 44 ♂ | 19 | Football | Elite | 45 min of training consisting of five stations with intermittent exercises | CK: ∅ CRP: ∅ TNFα: ∅ IL6: ∅ | 1 |
| HGF | *rs5745697* | Injury | [46] | 74 ♂ | 19 – 35 | Football | Elite | Five seasons follow-up | Injury incidence: *AA-CA > CC* Injury severity: *CC > AA-CA* Time to recover: *CC > AA-CA* | 1 |

Table 3 SNPs related to growth factors and muscle recovery regulators (continued)

| Gene | ID variation | Analysis | Ref | Pop | Age* | Sport | Level | Intervention | Significance of the SNP effect on the outcomes | Risk of bias** |
| --- | --- | --- | --- | --- | --- | --- | --- | --- | --- | --- |
| IGF1 | *rs35767* | Biological | [19] | 73 ♂ 78 ♀ | 25.3 ♂ 22.8 ♀ | No data | No data | 50 maximal eccentric contractions of the elbow flexors | CK: ∅ Mb: ∅ Muscle soreness: ∅ Strength loss: ∅ | 1 |
| IGF1 | *rs35767* | Biological | [43] | 44 ♂ | 19 | Football | Elite | 45 min of training consisting of five stations with intermittent exercises | CK: ∅ CRP: ∅ TNFα: *TT > TC-CC* IL6: ∅ | 1 |
| IGF2 | *rs2230949* | Biological | [19] | 73 ♂ 78 ♀ | 25.3 ♂ 22.8 ♀ | No data | No data | 50 maximal eccentric contractions of the elbow flexors | CK: ∅ Mb: ∅ Muscle soreness: *CC > CT* ♂  Strength loss: ∅ | 1 |
| IGF2 | *rs3213216* | Biological | [19] | 73 ♂ 78 ♀ | 25.3 ♂ 22.8 ♀ | No data | No data | 50 maximal eccentric contractions of the elbow flexors | CK: ∅ Mb: ∅ Muscle soreness: ∅ Strength loss: ∅ | 1 |
| IGF2 | *rs3213220* | Biological | [19] | 73 ♂ 78 ♀ | 25.3 ♂ 22.8 ♀ | No data | No data | 50 maximal eccentric contractions of the elbow flexors | CK: *TC > TT* ♀ Mb: *TC > TT* ♀ Muscle soreness: ∅ Strength loss: ∅ | 1 |
| IGF2 | *rs3213221* | Biological | [19] | 73 ♂ 78 ♀ | 25.3 ♂ 22.8 ♀ | No data | No data | 50 maximal eccentric contractions of the elbow flexors | CK: *GG > CC* ♂  Mb: ∅ Muscle soreness: *GG > CC* ♂  Strength loss: *GG > CC* ♂ | 1 |
| IGF2 | *rs3213221* | Biological | [43] | 44 ♂ | 19 | Football | Elite | 45 min of training consisting of five stations with intermittent exercises | CK: ∅ CRP: ∅ TNFα: ∅ IL6: ∅ | 1 |
| IGF2 | *rs3213221* | Injury | [46] | 74 ♂ | 19 – 35 | Football | Elite | Five seasons follow-up | Injury incidence: ∅ Injury severity: *GG-CC > GC* Time to recover: ∅ | 1 |

Table 3 SNPs related to growth factors and muscle recovery regulators (continued)

| Gene | ID variation | Analysis | Ref | Pop | Age* | Sport | Level | Intervention | Significance of the SNP effect on the outcomes | Risk of bias** |
| --- | --- | --- | --- | --- | --- | --- | --- | --- | --- | --- |
| IGF2 | *rs3213221* | Injury | [14] | 107 ♂ | 20 | Football | Elite | Six seasons of training and competitions, hamstring injuries follow-up | Injury incidence: ∅ Acute injury: ∅ Overuse injury: ∅ Severe injury: ∅ Recurrent injury: ∅ | 1 |
| IGF2 | *rs3213221* | Injury | [44] | 73 ♂ | 26.2 | Football | Elite | Three seasons follow-up | Injury severity: *CC-GG > GC* | 1 |
| IGF2 | *rs3213221* | Injury | [90] | 46 ♂ | 24.9 | Australian football | Elite | Seven seasons of training and competitions follow-up | Injury incidence: ∅ Injury severity: ∅ | 2 |
| IGF2 | *rs3213221* | Injury | [45] | 73 ♂ | No data | Football | Elite | Three seasons follow-up | Injury among white participants: *GG-GC > CC* (*P* = 0,059) Injury among hispanic participants: *GG > CC-CG* Injury among black participants: ∅ | 1 |
| IGF2 | *rs680* | Biological | [19] | 73 ♂ 78 ♀ | 25.3 ♂ 22.8 ♀ | No data | No data | 50 maximal eccentric contractions of the elbow flexors | CK: *AA > GG-GA* ♂  Mb: ∅ Muscle soreness: *GA > GG* ♂  Strength loss: *AA > GG* ♂ | 1 |
| IGF2AS | *rs4244808* | Biological | [19] | 73 ♂ 78 ♀ | 25.3 ♂ 22.8 ♀ | No data | No data | 50 maximal eccentric contractions of the elbow flexors | CK: ∅ Mb: ∅ Muscle soreness: *AA > AC* ♂  Strength loss: *AC > CC* ♀ and *AA > AC* ♂ | 1 |
| IGF2AS | *rs7924316* | Biological | [19] | 73 ♂ 78 ♀ | 25.3 ♂ 22.8 ♀ | No data | No data | 50 maximal eccentric contractions of the elbow flexors | CK: *TT > GT* ♂  Mb: *TT > GT* ♂  Muscle soreness: *TT > GG-GT* ♂  Strength loss: *TT > GT* ♂ | 1 |
| IGFBP3 | *rs2132570* | Biological | [19] | 73 ♂ 78 ♀ | 25.3 ♂ 22.8 ♀ | No data | No data | 50 maximal eccentric contractions of the elbow flexors | CK: ∅ Mb: ∅ Muscle soreness: ∅ Strength loss: ∅ | 1 |

Table 3 SNPs related to growth factors and muscle recovery regulators (continued)

| Gene | ID variation | Analysis | Ref | Pop | Age* | Sport | Level | Intervention | Significance of the SNP effect on the outcomes | Risk of bias** |
| --- | --- | --- | --- | --- | --- | --- | --- | --- | --- | --- |
| IGFBP3 | *rs6670* | Biological | [19] | 73 ♂ 78 ♀ | 25.3 ♂ 22.8 ♀ | No data | No data | 50 maximal eccentric contractions of the elbow flexors | CK: ∅ Mb: ∅ Muscle soreness: ∅ Strength loss: ∅ | 1 |
| INS | *rs3842748* | Biological | [19] | 73 ♂ 78 ♀ | 25.3 ♂ 22.8 ♀ | No data | No data | 50 maximal eccentric contractions of the elbow flexors | CK: *GG > CC* ♀ Mb: ∅ Muscle soreness: ∅ Strength loss: ∅ | 1 |
| LIF | *rs737812* | Injury | [46] | 74 ♂ | 19 – 35 | Football | Elite | Five seasons follow-up | Injury incidence: ∅ Injury severity: ∅ Time to recover: ∅ | 1 |
| LIF | *rs929271* | Injury | [46] | 74 ♂ | 19 – 35 | Football | Elite | Five seasons follow-up | Injury incidence: ∅ Injury severity: ∅ Time to recover: *CC-CT > TT* (*P* = 0.052) | 1 |
| LIN28A | *rs6598964* | Biological | [43] | 44 ♂ | 19 | Football | Elite | 45 min of training consisting of five stations with intermittent exercises | CK: ∅ CRP: ∅ TNFα: ∅ IL6: ∅ | 1 |
| MYF5 | *rs1163263* | Injury | [46] | 74 ♂ | 19 – 35 | Football | Elite | Five seasons follow-up | Injury incidence: ∅ Injury severity: ∅ Time to recover: ∅ | 1 |
| NOGGIN | *rs1372857* | Injury | [90] | 46 ♂ | 24.9 | Australian football | Elite | Seven seasons of training and competitions follow-up | Injury incidence: ∅ Injury severity: ∅ | 2 |
| SMAD6 | *rs2053423* | Injury | [90] | 46 ♂ | 24.9 | Australian football | Elite | Seven seasons of training and competitions follow-up | Injury incidence: ∅ Injury severity: ∅ | 2 |
| TRIM63 | *rs2275950* | Biological | [43] | 44 ♂ | 19 | Football | Elite | 45 min of training consisting of five stations with intermittent exercises | CK: ∅ CRP: ∅ TNFα: ∅ IL6: ∅ | 1 |
| TRIM63 | *rs2275950* | Injury | [91] | 46 ♂ | 21.3 | Football | Elite | One season of training and competitions follow-up | Injury incidence: ∅ | 2 |

Table 3 SNPs related to growth factors and muscle recovery regulators (continued)

| Gene | ID variation | Analysis | Ref | Pop | Age* | Sport | Level | Intervention | Significance of the SNP effect on the outcomes | Risk of bias** |
| --- | --- | --- | --- | --- | --- | --- | --- | --- | --- | --- |
| VDR | *rs10735810* | Injury | [92] | 38 ♂ | 19.8 | Various | Elite | Two seasons follow-up | Injury incidence: ∅ Injury severity: ∅ | 2 |
| VDR | *rs1544410* | Injury | [53] | 54 ♂ | 25.9 | Football | Elite | Two to five years follow-up | Injury incidence: ∅ Injury severity: ∅ | 1 |
| VDR | *rs2228570* | Injury | [53] | 54 ♂ | 25.9 | Football | Elite | Two to five years follow-up | Injury incidence: ∅ Injury severity: ∅ | 1 |
| VDR | *rs7975232* | Injury | [53] | 54 ♂ | 25.9 | Football | Elite | Two to five years follow-up | Injury incidence: ∅ Injury severity: ∅ | 1 |
| VEGFA | *rs2010963* | Biological | [43] | 44 ♂ | 19 | Football | Elite | 45 min of training consisting of five stations with intermittent exercises | CK: ∅ CRP: ∅ TNFα: ∅ IL6: ∅ | 1 |
| VEGFA | *rs2010963* | Injury | [14] | 107 ♂ | 20 | Football | Elite | Six seasons of training and competitions, hamstring injuries follow-up | Injury incidence: ∅ Acute injury: ∅ Overuse injury: ∅ Severe injury: ∅ Recurrent injury: ∅ | 1 |

**,* on mean or range in years; ***,* *1* low, *2* moderate, *3* high; *∅,* non-significant effect; *CK,* creatine kinase; *CRP,* C-reactive protein; *IL,* interleukin; *Mb,* myoglobin; *Pop,* population; *Ref,* reference; *TNF*α tumor necrosis factor-alpha.

Table 4 SNPs related to markers of inflammation and oxidative stress

| Gene | ID variation | Analysis | Ref | Pop | Age* | Sport | Level | Intervention | Significance of the SNP effect on the outcomes | Risk of bias** |
| --- | --- | --- | --- | --- | --- | --- | --- | --- | --- | --- |
| ADAM12 | *rs3740199* | Injury | [14] | 107 ♂ | 20 | Football | Elite | Six seasons of training and competitions, hamstring injuries follow-up | Injury incidence: ∅ Acute injury: ∅ Overuse injury: ∅ Severe injury: ∅ Recurrent injury: ∅ | 1 |
| ADAMTS14 | *rs4747096* | Injury | [14] | 107 ♂ | 20 | Football | Elite | Six seasons of training and competitions, hamstring injuries follow-up | Injury incidence: ∅ Acute injury: *AG > AA* Overuse injury: ∅ Severe injury: *AG > AA* Recurrent injury: ∅ | 1 |
| ADAMTS2 | *rs1054480* | Injury | [14] | 107 ♂ | 20 | Football | Elite | Six seasons of training and competitions, hamstring injuries follow-up | Injury incidence: ∅ Acute injury: ∅ Overuse injury: ∅ Severe injury: ∅ Recurrent injury: ∅ | 1 |
| ADAMTS5 | *rs226794* | Injury | [14] | 107 ♂ | 20 | Football | Elite | Six seasons of training and competitions, hamstring injuries follow-up | Injury incidence: ∅ Acute injury: ∅ Overuse injury: ∅ Severe injury: ∅ Recurrent injury: ∅ | 1 |
| CAT | *rs769214* | Biological | [93] | 28 ♂ | 25.1 | Water Polo | Trained | 90 min of match simulation | LDH: ∅ CK: ∅ CK-MB: ∅ Mb: ∅ Troponin: ∅ | 2 |
| CAT | *rs7943316* | Biological | [87] | 82 ♂ 53 ♀ | 15 – 19 (17 %) 20 – 40 (61.5 %) 41 – 58 (21.5 %) | No data | Trained | Free choice of running distance (4 – 21 km) | CK: ∅ AST: ∅ ALT: ∅ | 3 |

Table 4 SNPs related to markers of inflammation and oxidative stress (continued)

| Gene | ID variation | Analysis | Ref | Pop | Age* | Sport | Level | Intervention | Significance of the SNP effect on the outcomes | Risk of bias** |
| --- | --- | --- | --- | --- | --- | --- | --- | --- | --- | --- |
| CCL2 | *rs1024610* | Biological | [54] | 75 ♂ 82 ♀ | 25.3 | No data | No data | 50 maximal eccentric contractions of the elbow flexors | CK: ∅ Mb: ∅ Muscle soreness: ∅ Strength loss: ∅ | 1 |
| CCL2 | *rs1024611* | Biological | [54] | 75 ♂ 82 ♀ | 25.3 | No data | No data | 50 maximal eccentric contractions of the elbow flexors | CK: ∅ Mb: ∅ Muscle soreness: ∅ Strength loss: ∅ | 1 |
| CCL2 | *rs1024611* | Injury | [45] | 73 ♂ | No data | Football | Elite | Three seasons follow-up | Injury among white participants: ∅ Injury among hispanic participants: ∅ Injury among black participants: ∅ | 1 |
| CCL2 | *rs13900* | Biological | [54] | 75 ♂ 82 ♀ | 25.3 | No data | No data | 50 maximal eccentric contractions of the elbow flexors | CK: ∅ Mb: ∅ Muscle soreness: ∅ Strength loss: ∅ | 1 |
| CCL2 | *rs17652343* | Biological | [54] | 75 ♂ 82 ♀ | 25.3 | No data | No data | 50 maximal eccentric contractions of the elbow flexors | CK: ∅ Mb: ∅ Muscle soreness: ∅ Strength loss: ∅ | 1 |
| CCL2 | *rs1860189* | Biological | [54] | 75 ♂ 82 ♀ | 25.3 | No data | No data | 50 maximal eccentric contractions of the elbow flexors | CK: ∅ Mb: ∅ Muscle soreness: ∅ Strength loss: ∅ | 1 |
| CCL2 | *rs1860189* | Injury | [46] | 74 ♂ | 19 – 35 | Football | Elite | Five seasons follow-up | Injury incidence: ∅ Injury severity: ∅ Time to recover: ∅ | 1 |
| CCL2 | *rs2857654* | Biological | [54] | 75 ♂ 82 ♀ | 25.3 | No data | No data | 50 maximal eccentric contractions of the elbow flexors | CK: ∅ Mb: ∅ Muscle soreness: ∅ Strength loss: ∅ | 1 |

Table 4 SNPs related to markers of inflammation and oxidative stress (continued)

| Gene | ID variation | Analysis | Ref | Pop | Age* | Sport | Level | Intervention | Significance of the SNP effect on the outcomes | Risk of bias** |
| --- | --- | --- | --- | --- | --- | --- | --- | --- | --- | --- |
| CCL2 | *rs2857656* | Biological | [54] | 75 ♂ 82 ♀ | 25.3 | No data | No data | 50 maximal eccentric contractions of the elbow flexors | CK: ∅ Mb: ∅ Muscle soreness: ∅ Strength loss: ∅ | 1 |
| CCL2 | *rs2857656* | Biological | [43] | 44 ♂ | 19 | Football | Elite | 45 min of training consisting of five stations with intermittent exercises | CK: ∅ CRP: ∅ TNFα: ∅ IL6: ∅ | 1 |
| CCL2 | *rs2857656* | Injury | [46] | 74 ♂ | 19 – 35 | Football | Elite | Five seasons follow-up | Injury incidence: ∅ Injury severity: *GG > CC-CG* Time to recover: ∅ | 1 |
| CCL2 | *rs2857656* | Injury | [14] | 107 ♂ | 20 | Football | Elite | Six seasons of training and competitions, hamstring injuries follow-up | Injury incidence: ∅ Acute injury: ∅ Overuse injury: ∅ Severe injury: ∅ Recurrent injury: ∅ | 1 |
| CCL2 | *rs2857656* | Injury | [44] | 73 ♂ | 26.2 | Football | Elite | Three seasons follow-up | Injury severity: *GG > GC-CC* | 1 |
| CCL2 | *rs2857656* | Injury | [90] | 46 ♂ | 24.9 | Australian football | Elite | Seven seasons of training and competitions follow-up | Injury incidence: ∅ Injury severity: ∅ | 2 |
| CCL2 | *rs2857657* | Biological | [54] | 75 ♂ 82 ♀ | 25.3 | No data | No data | 50 maximal eccentric contractions of the elbow flexors | CK: ∅ Mb: ∅ Muscle soreness: ∅ Strength loss: ∅ | 1 |
| CCL2 | *rs3760396* | Biological | [54] | 75 ♂ 82 ♀ | 25.3 | No data | No data | 50 maximal eccentric contractions of the elbow flexors | CK: ∅ Mb: ∅ Muscle soreness: ∅ Strength loss: ∅ | 1 |

Table 4 SNPs related to markers of inflammation and oxidative stress (continued)

| Gene | ID variation | Analysis | Ref | Pop | Age* | Sport | Level | Intervention | Significance of the SNP effect on the outcomes | Risk of bias** |
| --- | --- | --- | --- | --- | --- | --- | --- | --- | --- | --- |
| CCL2 | *rs3917878* | Biological | [54] | 75 ♂ 82 ♀ | 25.3 | No data | No data | 50 maximal eccentric contractions of the elbow flexors | CK*: CT-TT > CC* ♀ but ∅ ♂ Mb: ∅ Muscle soreness: ∅ Strength loss: *CT-TT > CC* ♂ but ∅ ♀ | 1 |
| CCL2 | *rs3917878* | Biological | [43] | 44 ♂ | 19 | Football | Elite | 45 min of training consisting of five stations with intermittent exercises | CK: ∅ CRP: ∅ TNFα: ∅ IL6: ∅ | 1 |
| CCL2 | *rs4586* | Biological | [54] | 75 ♂ 82 ♀ | 25.3 | No data | No data | 50 maximal eccentric contractions of the elbow flexors | CK: ∅ Mb: ∅ Muscle soreness: ∅ Strength loss: ∅ | 1 |
| CCR2 | *rs17141010* | Biological | [54] | 75 ♂ 82 ♀ | 25.3 | No data | No data | 50 maximal eccentric contractions of the elbow flexors | CK: ∅ Mb: ∅ Muscle soreness: ∅ Strength loss: ∅ | 1 |
| CCR2 | *rs1799864* | Biological | [54] | 75 ♂ 82 ♀ | 25.3 | No data | No data | 50 maximal eccentric contractions of the elbow flexors | CK: ∅ Mb: ∅ Muscle soreness: ∅ Strength loss: ∅ | 1 |
| CCR2 | *rs1799865* | Biological | [54] | 75 ♂ 82 ♀ | 25.3 | No data | No data | 50 maximal eccentric contractions of the elbow flexors | CK: ∅ Mb: ∅ Muscle soreness: genotype effect Strength loss: ∅ | 1 |
| CCR2 | *rs3918358* | Biological | [54] | 75 ♂ 82 ♀ | 25.3 | No data | No data | 50 maximal eccentric contractions of the elbow flexors | CK: ∅ Mb: ∅ Muscle soreness: ∅ Strength loss: *CC-AC > AA* ♀ but ∅ ♂ | 1 |

Table 4 SNPs related to markers of inflammation and oxidative stress (continued)

| Gene | ID variation | Analysis | Ref | Pop | Age* | Sport | Level | Intervention | Significance of the SNP effect on the outcomes | Risk of bias** |
| --- | --- | --- | --- | --- | --- | --- | --- | --- | --- | --- |
| CCR2 | *rs768539* | Biological | [54] | 75 ♂ 82 ♀ | 25.3 | No data | No data | 50 maximal eccentric contractions of the elbow flexors | CK: ∅ Mb: ∅ Muscle soreness: ∅ Strength loss: ∅ | 1 |
| CCR2 | *rs768539* | Injury | [14] | 107 ♂ | 20 | Football | Elite | Six seasons of training and competitions, hamstring injuries follow-up | Injury incidence: ∅ Acute injury: ∅ Overuse injury: ∅ Severe injury: ∅ Recurrent injury: ∅ | 1 |
| GPX1 | *rs1050450* | Biological | [87] | 82 ♂ 53 ♀ | 15 – 19 (17 %) 20 – 40 (61.5 %) 41 – 58 (21.5 %) | No data | Trained | Free choice of running distance (4–21 km) | CK: ∅ AST: ∅ ALT: ∅ | 3 |
| GPX1 | *rs1800668* | Biological | [93] | 28 ♂ | 25.1 | Water Polo | Trained | 90 min of match simulation | LDH: ∅ CK: ∅ CK-MB: ∅ Mb: ∅ Troponin: ∅ | 2 |
| GSTM1 | *1p13.3* | Biological | [87] | 82 ♂ 53 ♀ | 15 – 19 (17 %) 20 – 40 (61.5 %) 41 – 58 (21.5 %) | No data | Trained | Free choice of running distance (4–21 km) | CK: ∅ AST: ∅ ALT: ∅ | 3 |
| GSTT1 | *22q11.2* | Biological | [87] | 82 ♂ 53 ♀ | 15 – 19 (17 %) 20 – 40 (61.5 %) 41 – 58 (21.5 %) | No data | Trained | Free choice of running distance (4–21 km) | CK: ∅ AST: ∅ ALT: ∅ | 3 |
| HP | *16q22.1* | Biological | [87] | 82 ♂ 53 ♀ | 15 – 19 (17 %) 20 – 40 (61.5 %) 41 – 58 (21.5 %) | No data | Trained | Free choice of running distance (4–21 km) | CK: ∅ AST: ∅ ALT: ∅ | 3 |

Table 4 SNPs related to markers of inflammation and oxidative stress (continued)

| Gene | ID variation | Analysis | Ref | Pop | Age* | Sport | Level | Intervention | Significance of the SNP effect on the outcomes | Risk of bias** |
| --- | --- | --- | --- | --- | --- | --- | --- | --- | --- | --- |
| IL1A | *+4845, G/T* | Biological | [94] | 24 ♂ | 30 | None | Untrained | Three lower limb exercises of three sets of eight repetitions at 80 % 1RM + one set to failure | IL6: ∅ IL1B: ∅ TNFα: ∅ CD68: ∅ | 2 |
| IL1A | *rs1800587* | Injury | [14] | 107 ♂ | 20 | Football | Elite | Six seasons of training and competitions, hamstring injuries follow-up | Injury incidence: ∅ Acute injury: ∅ Overuse injury: ∅ Severe injury: *CT > CC-TT* Recurrent injury: ∅ | 1 |
| IL1B | *+3954, C/T* | Biological | [94] | 24 ♂ | 30 | None | Untrained | Three lower limb exercises of three sets of eight repetitions at 80 % 1RM + one set to failure | IL6: *1.1 > 1.2-2.2* IL1B: *1.1 > 1.2-2.2* TNFα: *1.1 > 1.2-2.2* CD68: ∅ | 2 |
| IL1B | *−3737, C/T* | Biological | [94] | 24 ♂ | 30 | None | Untrained | Three lower limb exercises of three sets of eight repetitions at 80 % 1RM + one set to failure | IL6: *2.2 > 1.1-1.2* IL1B: ∅ TNFα: ∅ CD68: ∅ | 2 |
| IL1B | *−511, C/T* | Biological | [94] | 24 ♂ | 30 | None | Untrained | Three lower limb exercises of three sets of eight repetitions at 80 % 1RM + one set to failure | IL6: ∅ IL1B: ∅ TNFα: ∅ CD68: ∅ | 2 |
| IL1B | *rs1143634* | Biological | [43] | 44 ♂ | 19 | Football | Elite | 45 min of training consisting of five stations with intermittent exercises | CK: ∅ CRP: ∅ TNFα: ∅ IL6: ∅ | 1 |
| IL1B | *rs1143634* | Injury | [14] | 107 ♂ | 20 | Football | Elite | Six seasons of training and competitions, hamstring injuries follow-up | Injury incidence: ∅ Acute injury: ∅ Overuse injury: ∅ Severe injury: ∅ Recurrent injury: ∅ | 1 |

Table 4 SNPs related to markers of inflammation and oxidative stress (continued)

| Gene | ID variation | Analysis | Ref | Pop | Age* | Sport | Level | Intervention | Significance of the SNP effect on the outcomes | Risk of bias** |
| --- | --- | --- | --- | --- | --- | --- | --- | --- | --- | --- |
| IL1RN | *+2018, T/C* | Biological | [94] | 24 ♂ | 30 | None | Untrained | Three lower limb exercises of three sets of eight repetitions at 80 % 1RM + one set to failure | IL6: ∅ and *1.2 -2.2 > 1.1* (with SNPs’ association) IL1B: ∅ and *1.2-2.2 > 1.1* (with SNPs’ association) TNFα: ∅ and *1.2-2.2 > 1.1* (with SNPs’ association) CD68: ∅ and *1.2-2.2 > 1.1* (with SNPs’ association) | 2 |
| IL6 | *rs1800795* | Biological | [58] | 42 ♂ 28 ♀ | 25 | No data | Untrained | 50 maximal eccentric contractions of the elbow flexors | CK: *CC-GC > GG* | 1 |
| IL6 | *rs1800795* | Biological | [43] | 44 ♂ | 19 | Football | Elite | 45 min of training consisting of five stations with intermittent exercises | CK: *CC > GG-GC* CRP: ∅ TNFα: ∅ IL6: ∅ | 1 |
| IL6 | *rs1800795* | Injury | [14] | 107 ♂ | 20 | Football | Elite | Six seasons of training and competitions, hamstring injuries follow-up | Injury incidence: ∅ Acute injury: ∅ Overuse injury: ∅ Severe injury: ∅ Recurrent injury: ∅ | 1 |
| IL6R | *rs2228145* | Injury | [14] | 107 ♂ | 20 | Football | Elite | Six seasons of training and competitions, hamstring injuries follow-up | Injury incidence: ∅ Acute injury: ∅ Overuse injury: ∅ Severe injury: ∅ Recurrent injury: ∅ | 1 |
| MMP1 | *rs1799750* | Injury | [14] | 107 ♂ | 20 | Football | Elite | Six seasons of training and competitions, hamstring injuries follow-up | Injury incidence: *DD-DI > II* Acute injury: *D > I* Overuse injury: ∅ Severe injury: ∅ Recurrent injury: ∅ | 1 |
| MMP12 | *rs2276109* | Injury | [14] | 107 ♂ | 20 | Football | Elite | Six seasons of training and competitions, hamstring injuries follow-up | Injury incidence: *A > G* Acute injury: ∅ Overuse injury: ∅ Severe injury: ∅ Recurrent injury: ∅ | 1 |

Table 4 SNPs related to markers of inflammation and oxidative stress (continued)

| Gene | ID variation | Analysis | Ref | Pop | Age* | Sport | Level | Intervention | Significance of the SNP effect on the outcomes | Risk of bias** |
| --- | --- | --- | --- | --- | --- | --- | --- | --- | --- | --- |
| MMP3 | *rs522616* | Biological | [61] | 50 ♂ 45 ♀ | 22.6 ♂ 21.6 ♀ | No data | No data | Five sets of six maximal eccentric elbow flexions | Strength loss: *GG-AG > AA* ♂ but ∅ ♀ ROM: ∅ Muscle soreness: ∅  CK: ∅ IL6: ∅ | 1 |
| MMP3 | *rs591058* | Biological | [43] | 44 ♂ | 19 | Football | Elite | 45 min of training consisting of five stations with intermittent exercises | CK: ∅ CRP: ∅ TNFα: ∅ IL6: ∅ | 1 |
| MMP3 | *rs650108* | Biological | [43] | 44 ♂ | 19 | Football | Elite | 45 min of training consisting of five stations with intermittent exercises | CK: ∅ CRP: ∅ TNFα: ∅ IL6: ∅ | 1 |
| MMP3 | *rs679620* | Biological | [43] | 44 ♂ | 19 | Football | Elite | 45 min of training consisting of five stations with intermittent exercises | CK: ∅ CRP: ∅ TNFα: ∅ IL6: ∅ | 1 |
| MMP3 | *rs679620* | Injury | [46] | 74 ♂ | 19 – 35 | Football | Elite | Five seasons follow-up | Injury incidence: ∅ Injury severity: ∅ Time to recover: ∅ | 1 |
| MMP3 | *rs679620* | Injury | [14] | 107 ♂ | 20 | Football | Elite | Six seasons of training and competitions, hamstring injuries follow-up | Injury incidence: *A > G* Acute injury: *A > G* Overuse injury: *A > G* Severe injury: *A > G* Recurrent injury: *A > G* | 1 |
| PON1 | *rs662* | Biological | [95] | 28 ♂ | 25.1 | Water Polo | Elite | Friendly match of 90 min | CK: ∅ LDH: ∅ Mb: ∅ Troponin: *QR > QQ* but *QR > QQ* before the match | 2 |

Table 4 SNPs related to markers of inflammation and oxidative stress (continued)

| Gene | ID variation | Analysis | Ref | Pop | Age* | Sport | Level | Intervention | Significance of the SNP effect on the outcomes | Risk of bias** |
| --- | --- | --- | --- | --- | --- | --- | --- | --- | --- | --- |
| SOD2 | *rs4880* | Biological | [87] | 82 ♂ 53 ♀ | 15 – 19 (17 %) 20 – 40 (61.5 %) 41 – 58 (21.5 %) | No data | Trained | Free choice of running distance (4–21 km) | CK: *Val/Val-Val/Ala > Ala/Ala* AST: ∅ ALT: ∅ | 3 |
| SOD2 | *rs4880* | Biological | [43] | 44 ♂ | 19 | Football | Elite | 45 min of training consisting of five stations with intermittent exercises | CK: ∅ CRP: ∅ TNFα: ∅ IL6: ∅ | 1 |
| SOD2 | *rs4880* | Biological | [93] | 28 ♂ | 25.1 | Water Polo | Trained | 90 min of match simulation | LDH: *AA-VV > AV* CK: *VV > AA-AV* CK-MB: ∅ but *VV > AV* pre-exercise Mb: *VV > AV* but *VV-AA > AV* pre-exercise Troponin: ∅ but *VV > AV* pre-exercise | 2 |
| SOD2 | *rs4880* | Injury | [14] | 107 ♂ | 20 | Football | Elite | Six seasons of training and competitions, hamstring injuries follow-up | Injury incidence: ∅ Acute injury: ∅ Overuse injury: ∅ Severe injury: ∅ Recurrent injury: ∅ | 1 |
| SOD3 | *rs1799895* | Biological | [63] | 47 ♂ | 35.2 | Endurance runner | Trained | Time to exhaustion running test on a treadmill with a speed set at 80 % of VO2max | CK: ∅ LDH: ∅ | 1 |
| SPP1 | *rs28357094* | Biological | [43] | 44 ♂ | 19 | Football | Elite | 45 min of training consisting of five stations with intermittent exercises | CK: ∅ CRP: ∅ TNFα: ∅ IL6: ∅ | 1 |

Table 4 SNPs related to markers of inflammation and oxidative stress (continued)

| Gene | ID variation | Analysis | Ref | Pop | Age* | Sport | Level | Intervention | Significance of the SNP effect on the outcomes | Risk of bias** |
| --- | --- | --- | --- | --- | --- | --- | --- | --- | --- | --- |
| TNF | *rs1800629* | Biological | [58] | 42 ♂ 28 ♀ | 25 | No data | Untrained | 50 maximal eccentric contractions of the elbow flexors | CK: *GG > GA* (*P* = 0.06) | 1 |
| TNF | *rs1800629* | Biological | [43] | 44 ♂ | 19 | Football | Elite | 45 min of training consisting of five stations with intermittent exercises | CK: ∅ CRP: ∅ TNFα: ∅ IL6: ∅ | 1 |
| TNF | *rs1800629* | Injury | [14] | 107 ♂ | 20 | Football | Elite | Six seasons of training and competitions, hamstring injuries follow-up | Injury incidence: ∅ Acute injury: ∅ Overuse injury: ∅ Severe injury: ∅ Recurrent injury: ∅ | 1 |

**,* on mean or range in years; ***,* *1* low, *2* moderate, *3* high; *∅,* non-significant effect*;* *ALT,* alanine transaminase; *AST,* aspartate transaminase; *CD68* ,macrophage; *CK,* creatine kinase; *CRP,* C-reactive protein; *IL,* interleukin; *LDH,* lactate dehydrogenase; *MB,* muscle-brain; *Mb,* myoglobin; *Pop,* population; *Ref,* reference; *ROM,* range of motion; *TNF*α, tumor necrosis factor-alpha.

Table 5 SNPs related to structural proteins of skeletal muscle

| Gene | ID variation | Analysis | Ref | Pop | Age* | Sport | Level | Intervention | Significance of the SNP effect on the outcomes | Risk of bias** |
| --- | --- | --- | --- | --- | --- | --- | --- | --- | --- | --- |
| ACAN | *rs1516797* | Injury | [14] | 107 ♂ | 20 | Football | Elite | Six seasons of training and competitions, hamstring injuries follow-up | Injury incidence: ∅ Acute injury: *GG-TT > TG* Overuse injury: ∅ Severe injury: ∅ Recurrent injury: ∅ | 1 |
| ACTN3 | *rs1815739* | Biological | [96] | 19 ♂ 4 ♀ | *RR*: 36.5 *RX-XX*: 36.4 | Triathlon | Trained | Triathlon | Jump height decrease: *XX-XR > RR* CK-MM: *XX-XR > RR*, but *XX-XR > RR* before (*P* = 0.07) Mb: ∅ Muscle soreness: *XX-XR > RR* (*P* =0.06) Perceived exertion: ∅ | 3 |
| ACTN3 | *rs1815739* | Biological | [97] | 27 ♂ | 25 | Weight training | Trained | Three lower limb exercises of four sets at 10 RM or failure at 85 % 1RM | CCL2: *XX > RR-RX* (but *XX* has less total volume/exercise) IL8: ∅ (but *XX* less total volume/exercise) LDH: *XX > RR-RX* (but *XX* has less total volume/exercise) Muscle soreness: *XX > RR-RX* (but *XX* has less total volume/exercise) Mb: *RR-RX > XX* (but *XX* has less total volume/exercise) CK: *RR-RX > XX* (but *XX* has less total volume/exercise) | 3 |
| ACTN3 | *rs1815739* | Biological | [98] | 20 ♂ | 22 | No data | No data | Four sets of 20 maximal eccentric knee extensions per leg | Strength loss: ∅ CK: ∅ Muscle soreness: *XX > RR* CSRP3: ∅ HSP70: ∅ IL6: ∅ CARP: ∅ | 3 |
| ACTN3 | *rs1815739* | Biological | [99] | 37 ♂ | *RR*: 24.8 *RX*: 27.1 *XX*: 21.3 | Football | Elite | Two times a circuit composed of five stations with intermittent exercises | CK: *XX > RR* A-actin: *XX > RR-RX* IL6: *RR > XX* | 3 |

Table 5 SNPs related to structural proteins of skeletal muscle (continued)

| Gene | ID variation | Analysis | Ref | Pop | Age* | Sport | Level | Intervention | Significance of the SNP effect on the outcomes | Risk of bias** |
| --- | --- | --- | --- | --- | --- | --- | --- | --- | --- | --- |
| ACTN3 | *rs1815739* | Biological | [100] | 8 ♂ | *RR*: 20.1 *XX*: 21.7 | Physically active participants | No data | 10 sets of 10 maximal isokinetic eccentric contractions of the quadriceps + an additional set | CK: ∅ Mb: ∅ Strength loss: ∅ Muscle soreness: ∅ | 3 |
| ACTN3 | *rs1815739* | Biological | [16] | 78 ♂ 79 ♀ | 24.1 | No data | No data | 50 maximal eccentric contractions of the elbow flexors | CK: ∅ Mb: ∅ Strength loss: ∅ | 1 |
| ACTN3 | *rs1815739* | Biological | [18] | 50 ♂ 45 ♀ | 22.6 ♂ 21.6 ♀ | Various | Trained | Five sets of six maximal eccentric elbow flexions | CK: *XX > RX-RR* IL6: ∅ Strength loss: ∅ ROM loss: ∅ Muscle soreness: ∅ | 1 |
| ACTN3 | *rs1815739* | Biological | [65] | 18 ♂ | *RR*: 25.1 *XX*: 25.8 | Various | Untrained | Two sets of 50 drop jumps from 40 cm | Muscle soreness: ∅ CK: ∅ Jump height: ∅ Isometric strength loss: *RR > XX* Isokinetic peak torque loss: *RR > XX* | 1 |
| ACTN3 | *rs1815739* | Biological | [66] | 32 ♂ | 23 | Military | Trained | Five km run in up to 25 min | RPE post five km run: ∅ CK: ∅ CK-MB: ∅ Mb: ∅ LDH: ∅ | 1 |
| ACTN3 | *rs1815739* | Biological | [43] | 44 ♂ | 19 | Football | Elite | 45 min of training consisting of five stations with intermittent exercises | CK: ∅ CRP: ∅ TNFα: ∅ IL6: ∅ | 1 |

Table 5 SNPs related to structural proteins of skeletal muscle (continued)

| Gene | ID variation | Analysis | Ref | Pop | Age* | Sport | Level | Intervention | Significance of the SNP effect on the outcomes | Risk of bias** |
| --- | --- | --- | --- | --- | --- | --- | --- | --- | --- | --- |
| ACTN3 | *rs1815739* | Biological | [20] | 39 ♂ | 18 – 35 | No data | Physically active | Wingate test | CK: *XX > RR* | 1 |
| ACTN3 | *rs1815739* | Biological | [17] | 35 ♂ | *RR*: 22.4 *RX-XX*: 22 | None | Untrained | 30 min downhill run at 70 % vVO2max | IPT: *RR > XX-XR* RTD: ∅ CMJ: ∅ SJ: ∅ CK: *RR > XX-XR* Muscle soreness: ∅ ROM: ∅ Circumference change: ∅ Perceived exertion: ∅ | 1 |
| ACTN3 | *rs1815739* | Biological | [101] | 81 ♂ | 39 | Endurance runner | Trained | Marathon | Mb: *RR-RX > XX* | 2 |
| ACTN3 | *rs1815739* | Injury | [102] | 43 | 27.8 | Football | Elite | Seven seasons follow-up | Injury incidence: genotype effect Injury severity: ∅ Time to recover: ∅ | 3 |
| ACTN3 | *rs1815739* | Injury | [88] | 99 ♀ | 19.7 | Various | Trained | Injury history determined by questionnaire | Injury incidence: genotype effect | 3 |
| ACTN3 | *rs1815739* | Injury | [103] | Injured: 116 ♂ and 26 ♀ Control: 86 ♂ and 47 ♀ | Injured: 36.1 Control: 22 | Endurance disciplines | Trained | Injury history determined by questionnaire | Total injury incidence: ∅ Single injury incidence: ∅ Multiple injury incidence: ∅ | 3 |
| ACTN3 | *rs1815739* | Injury | [21] | 169 ♂ | 19.4 | Football | Elite | Five seasons follow-up | Injury incidence: *XX > RR ; RR = XR* Severe injury: *XX-RX > RR* | 1 |
| ACTN3 | *rs1815739* | Injury | [15] | 64 ♂ | 23.1 | Football | Elite | 10 years of training and competitions follow-up | Injury incidence: *TT > CC* Injury severity: ∅ | 1 |

Table 5 SNPs related to structural proteins of skeletal muscle (continued)

| Gene | ID variation | Analysis | Ref | Pop | Age* | Sport | Level | Intervention | Significance of the SNP effect on the outcomes | Risk of bias** |
| --- | --- | --- | --- | --- | --- | --- | --- | --- | --- | --- |
| ACTN3 | *rs1815739* | Injury | [68] | 191♀ | *RR*: 23.8 *RX*: 23.1 *XX*: 24.3 | Football | Elite | One season of training and competitions follow-up | Injury incidence: ∅ | 1 |
| ACTN3 | *rs1815739* | Injury | [39] | 168 ♀ | 23.3 | Football | Trained | One season of training and competitions follow-up | Injury incidence: ∅ | 1 |
| ACTN3 | *rs1815739* | Injury | [14] | 107 ♂ | 20 | Football | Elite | Six seasons of training and competitions, hamstring injuries follow-up | Injury incidence: ∅ Acute injury: ∅ Overuse injury: ∅ Severe injury: ∅ Recurrent injury: ∅ | 1 |
| ACTN3 | *rs1815739* | Injury | [67] | 50 ♀ | 26.2 | Volleyball | Elite | Pluriannual follow-up | Severe injury incidence : ∅ | 1 |
| ACTN3 | *rs1815739* | Injury | [12] | 315 ♂ | *RR*: 26.8 *RX*: 26.2 *XX*: 26.8 | Football | Elite | One season follow-up | Injury incidence: *XX > RR* Time to recover: ∅ | 1 |
| ACTN3 | *rs1815739* | Injury | [69] | 22 ♂ 24 ♀ | 26.1 | Football | Elite | Five seasons follow-up | Injury incidence: *XX -XR > RR* Time to recover: *XX > RX* | 1 |
| ACTN3 | *rs1815739* | Injury | [11] | 83 ♂ | *RR*: 24 *RX*: 26 *XX*: 27 | Football | Elite | Three seasons follow-up | Injury incidence: *RX-XX > RR* (*P* = 0.08) and *XX > RX > RR* Severe injury: *XX > XR-RR* | 2 |
| ACTN3 | *rs1815739* | Injury | [90] | 46 ♂ | 24.9 | Australian football | Elite | Seven seasons of training and competitions follow-up | Injury incidence: ∅ Injury severity: ∅ | 2 |
| ACTN3 | *rs1815739* | Injury | [89] | 200 ♂ | > 18 | Rugby | Elite | Medical history and injury data | Injury incidence: ∅ | 2 |
| COL12A1 | *rs970547* | Injury | [14] | 107 ♂ | 20 | Football | Elite | Six seasons of training and competitions, hamstring injuries follow-up | Injury incidence: ∅ Acute injury: ∅ Overuse injury: ∅ Severe injury: ∅ Recurrent injury: ∅ | 1 |
| COL12A1 | *rs970547* | Injury | [90] | 46 ♂ | 24.9 | Australian football | Elite | Seven seasons of training and competitions follow-up | Injury incidence: ∅ Injury severity: ∅ | 2 |

Table 5 SNPs related to structural proteins of skeletal muscle (continued)

| Gene | ID variation | Analysis | Ref | Pop | Age* | Sport | Level | Intervention | Significance of the SNP effect on the outcomes | Risk of bias** |
| --- | --- | --- | --- | --- | --- | --- | --- | --- | --- | --- |
| COL1A1 | *rs1107946* | Injury | [14] | 107 ♂ | 20 | Football | Elite | Six seasons of training and competitions, hamstring injuries follow-up | Injury incidence: ∅ Acute injury: ∅ Overuse injury: ∅ Severe injury: ∅ Recurrent injury: ∅ | 1 |
| COL1A1 | *rs1107946* | Injury | [45] | 73 ♂ | No data | Football | Elite | Three seasons follow-up | Injury among white participants: ∅ Injury among hispanic participants: ∅ Injury among black participants: ∅ | 1 |
| COL1A1 | *rs1800012* | Biological | [43] | 44 ♂ | 19 | Football | Elite | 45 min of training consisting of five stations with intermittent exercises | CK: ∅ CRP: ∅ TNFα: ∅ IL6: ∅ | 1 |
| COL1A1 | *rs1800012* | Injury | [14] | 107 ♂ | 20 | Football | Elite | Six seasons of training and competitions, hamstring injuries follow-up | Injury incidence: ∅ Acute injury: ∅ Overuse injury: ∅ Severe injury: ∅ Recurrent injury: ∅ | 1 |
| COL1A1 | *rs1800012* | Injury | [44] | 73 ♂ | 26.2 | Football | Elite | Three seasons follow-up | Injury severity: ∅ | 1 |
| COL1A1 | *rs1800012* | Injury | [90] | 46 ♂ | 24.9 | Australian football | Elite | Seven seasons of training and competitions follow-up | Injury incidence: ∅ Injury severity: ∅ | 2 |
| COL1A1 | *rs1800012* | Injury | [89] | 200 ♂ | > 18 | Rugby | Elite | Medical history and injury data | Injury incidence: ∅ | 2 |
| COL22A1 | *rs11784270* | Injury | [70] | 1870 ♂ 767 ♀ | 20.2 | Various | Trained | Collection of injury history via questionnaire | Injury incidence: *AA > AC-CC* for ♂ + ♀ and ♀ | 1 |
| COL22A1 | *rs6577958* | Injury | [70] | 1870 ♂ 767 ♀ | 20.2 | Various | Trained | Collection of injury history via questionnaire | Injury incidence: *TT > TC-CC* for ♂ + ♀ and ♀ | 1 |

Table 5 SNPs related to structural proteins of skeletal muscle (continued)

| Gene | ID variation | Analysis | Ref | Pop | Age* | Sport | Level | Intervention | Significance of the SNP effect on the outcomes | Risk of bias** |
| --- | --- | --- | --- | --- | --- | --- | --- | --- | --- | --- |
| COL5A1 | *rs12722* | Biological | [43] | 44 ♂ | 19 | Football | Elite | 45 min of training consisting of five stations with intermittent exercises | CK: ∅ CRP: ∅ TNFα: ∅ IL6: *TT > TC-CC* | 1 |
| COL5A1 | *rs12722* | Injury | [15] | 64 ♂ | 23.1 | Football | Elite | 10 years of training and competitions follow-up | Injury incidence: *TT > TC* Injury severity: ∅ | 1 |
| COL5A1 | *rs12722* | Injury | [71] | 1063 ♂ 496 ♀ | 20 | Various | Trained | Injury history determined by questionnaire | Injury incidence: ∅ Injury severity: ∅ | 1 |
| COL5A1 | *rs12722* | Injury | [46] | 74 ♂ | 19–35 | Football | Elite | Five seasons follow-up | Injury incidence: ∅ Injury severity: *TC > TT-CC* Time to recover: ∅ | 1 |
| COL5A1 | *rs12722* | Injury | [14] | 107 ♂ | 20 | Football | Elite | Six seasons of training and competitions, hamstring injuries follow-up | Injury incidence: ∅ Acute injury: ∅ Overuse injury: ∅ Severe injury: ∅ Recurrent injury: ∅ | 1 |
| COL5A1 | *rs12722* | Injury | [72] | 54 ♂ | 25.9 | Football | Elite | Four seasons of training and competitions follow-up | Injury incidence: ∅ Injury severity: ∅ | 1 |
| COL5A1 | *rs12722* | Injury | [44] | 73 ♂ | 26.2 | Football | Elite | Three seasons follow-up | Injury severity: ∅ | 1 |
| COL5A1 | *rs12722* | Injury | [45] | 73 ♂ | No data | Football | Elite | Three seasons follow-up | Injury among white participants: ∅ Injury among hispanic participants: ∅ Injury among black participants: ∅ | 1 |
| COL5A1 | *rs12722* | Injury | [90] | 46 ♂ | 24.9 | Australian football | Elite | Seven seasons of training and competitions follow-up | Injury incidence: ∅ Injury severity: ∅ | 2 |
| COL5A1 | *rs12722* | Injury | [92] | 38 ♂ | 19.8 | Various | Elite | Two seasons follow-up | Injury incidence: *CC > TT* Injury severity: ∅ | 2 |

Table 5 SNPs related to structural proteins of skeletal muscle (continued)

| Gene | ID variation | Analysis | Ref | Pop | Age* | Sport | Level | Intervention | Significance of the SNP effect on the outcomes | Risk of bias** |
| --- | --- | --- | --- | --- | --- | --- | --- | --- | --- | --- |
| COL5A1 | *rs16399* | Injury | [14] | 107 ♂ | 20 | Football | Elite | Six seasons of training and competitions, hamstring injuries follow-up | Injury incidence: *DI > DD-II* Acute injury: *DI > DD-II* Overuse injury: ∅ Severe injury: ∅ Recurrent injury: ∅ | 1 |
| COL5A1 | *rs3196378* | Biological | [43] | 44 ♂ | 19 | Football | Elite | 45 min of training consisting of five stations with intermittent exercises | CK: ∅ CRP: ∅ TNFα: ∅ IL6: genotype effect | 1 |
| DCN | *rs516115* | Injury | [14] | 107 ♂ | 20 | Football | Elite | Six seasons of training and competitions, hamstring injuries follow-up | Injury incidence: *A > G* Acute injury: *A > G* Overuse injury: ∅ Severe injury: ∅ Recurrent injury: ∅ | 1 |
| DES | *rs58999456* | Injury | [46] | 74 ♂ | 19 – 35 | Football | Elite | Five seasons follow-up | Injury incidence: ∅ Injury severity: ∅ Time to recover: ∅ | 1 |
| DES | *rs60794845* | Injury | [46] | 74 ♂ | 19 – 35 | Football | Elite | Five seasons follow-up | Injury incidence: ∅ Injury severity: ∅ Time to recover: ∅ | 1 |
| ELN | *rs2071307* | Injury | [45] | 73 ♂ | No data | Football | Elite | Three seasons follow-up | Injury among white participants: ∅ Injury among hispanic participants: genotype effect Injury among black participants: ∅ | 1 |

Table 5 SNPs related to structural proteins of skeletal muscle (continued)

| Gene | ID variation | Analysis | Ref | Pop | Age* | Sport | Level | Intervention | Significance of the SNP effect on the outcomes | Risk of bias** |
| --- | --- | --- | --- | --- | --- | --- | --- | --- | --- | --- |
| EMILIN1 | *rs2289360* | Biological | [43] | 44 ♂ | 19 | Football | Elite | 45 min of training consisting of five stations with intermittent exercises | CK: ∅ CRP: ∅ TNFα: ∅ IL6: ∅ | 1 |
| EMILIN1 | *rs2289360* | Injury | [14] | 107 ♂ | 20 | Football | Elite | Six seasons of training and competitions, hamstring injuries follow-up | Injury incidence: ∅ Acute injury: ∅ Overuse injury: ∅ Severe injury: ∅ Recurrent injury: *GA > GG-AA* | 1 |
| EMILIN1 | *rs2289360* | Injury | [44] | 73 ♂ | 26.2 | Football | Elite | Three seasons follow-up | Injury severity: ∅ | 1 |
| EMILIN1 | *rs2289360* | Injury | [90] | 46 ♂ | 24.9 | Australian football | Elite | Seven seasons of training and competitions follow-up | Injury incidence: ∅ Injury severity: ∅ | 2 |
| MSTN | *rs1805086* | Biological | [104] | 48 ♂ | 24 | No data | No data | 50 maximal eccentric contractions of the elbow flexors | CK: ∅ AST: ∅ Time to strength recovery: *AA > AT* Muscle soreness: ∅ | 1 |
| MYLK | *rs2700352* | Biological | [16] | 78 ♂ 79 ♀ | 24.1 | No data | No data | 50 maximal eccentric contractions of the elbow flexors | CK*: TT > CC-CT* Mb: *TT > CC-CT* Strength loss: no data | 1 |
| MYLK | *rs2700352* | Biological | [43] | 44 ♂ | 19 | Football | Elite | 45 min of training consisting of five stations with intermittent exercises | CK: ∅ CRP: ∅ TNFα: ∅ IL6: ∅ | 1 |
| MYLK | *rs2700352* | Biological | [105] | 26 ♂ | 21.5 | Inactive | Untrained | 10 sets of 10 maximal squat jumps | CK: *CC > TT-CT* (but no *P* indicates) Mb: *CC > TT-CT* (but no *P* indicates) CRP: no data Muscle soreness: no data | 2 |

Table 5 SNPs related to structural proteins of skeletal muscle (continued)

| Gene | ID variation | Analysis | Ref | Pop | Age* | Sport | Level | Intervention | Significance of the SNP effect on the outcomes | Risk of bias** |
| --- | --- | --- | --- | --- | --- | --- | --- | --- | --- | --- |
| MYLK | *rs2700352* | Injury | [39] | 168 ♀ | 23.3 | Football | Trained | One season of training and competitions follow-up | Injury incidence: ∅ | 1 |
| MYLK | *rs2700352* | Injury | [14] | 107 ♂ | 20 | Football | Elite | Six seasons of training and competitions, hamstring injuries follow-up | Injury incidence: ∅ Acute injury: ∅ Overuse injury: ∅ Injury severity: *TT > CC-CT* Recurrent injury: ∅ | 1 |
| MYLK | *rs28497577* | Biological | [16] | 78 ♂ 79 ♀ | 24.1 | No data | No data | 50 maximal eccentric contractions of the elbow flexors | CK: *AC > CC* Mb: ∅ Strength loss: *AC > CC* | 1 |
| MYLK | *rs28497577* | Injury | [39] | 168 ♀ | 23.3 | Football | Trained | One season of training and competitions follow-up | Injury incidence: ∅ | 1 |
| TNC | *rs2104772* | Biological | [43] | 44 ♂ | 19 | Football | Elite | 45 min of training consisting of five stations with intermittent exercises | CK: ∅ CRP: ∅ TNFα: ∅ IL6: ∅ | 1 |
| TNC | *rs2104772* | Injury | [14] | 107 ♂ | 20 | Football | Elite | Six seasons of training and competitions, hamstring injuries follow-up | Injury incidence: ∅ Acute injury: ∅ Overuse injury: ∅ Severe injury: ∅ Recurrent injury: ∅ | 1 |
| TNC | *rs2104772* | Injury | [44] | 73 ♂ | 26.2 | Football | Elite | Three seasons follow-up | Injury severity: ∅ | 1 |
| TNC | *rs2104772* | Injury | [45] | 73 ♂ | No data | Football | Elite | Three seasons follow-up | Injury among white participants: ∅ Injury among hispanic participants: ∅ Injury among black participants: ∅ | 1 |

Table 5 SNPs related to structural proteins of skeletal muscle (continued)

| Gene | ID variation | Analysis | Ref | Pop | Age* | Sport | Level | Intervention | Significance of the SNP effect on the outcomes | Risk of bias** |
| --- | --- | --- | --- | --- | --- | --- | --- | --- | --- | --- |
| TTN | *89464A>G* | Injury | [45] | 73 ♂ | No data | Football | Elite | Three seasons follow-up | Injury among white participants: ∅ Injury among hispanic participants: ∅ Injury among black participants: ∅ | 1 |
| TTN | *rs1001238* | Biological | [77] | 46 ♂ | *CC*: 19 *TC*: 18 *TT*: 18 | Football | Elite | Two times a circuit composed of five stations with intermittent exercises | CK: *CC > CT-TT* CRP: *CC > CT-TT* IGF1: *TT-TC > CC* at 24 h and *CC > TT-TC* at 48 h TNFα: *CC-CT > TT* | 1 |
| TTN | *rs2742327* | Injury | [14] | 107 ♂ | 20 | Football | Elite | Six seasons of training and competitions, hamstring injuries follow-up | Injury incidence: ∅ Acute injury: ∅ Overuse injury: ∅ Severe injury: ∅ Recurrent injury: ∅ | 1 |
| TTN | *rs2742327* | Injury | [44] | 73 ♂ | 26.2 | Football | Elite | Three seasons follow-up | Injury severity: ∅ | 1 |

**,* on mean or range in years; ***,* *1* low, *2* moderate, *3* high; *∅,* non-significant effect; *AST,* aspartate transaminase; *CARP,* cardiac ankyrin repeat protein; *CCL2,* C-C motif ligand 2; *CK,* creatine kinase; *CMJ,* countermovement jump; *CRP,* C-reactive protein; *CSRP3,* cysteine- and glycine-rich protein 3; *HSP70,* heat shock proteins 70; *IGF1,* insulin-like growth factor 1; *IL,* interleukin; *IPT,* isometric peak torque; *LDH,* lactate dehydrogenase; *MB,* muscle-brain; *Mb,* myoglobin; *MM,* muscle-muscle; *Pop,* population; *Ref,* reference; *ROM,* range of motion; *RPE,* rate of perceived exertion; *RTD,* rate of torque development; *SJ,* squat jump; *TNF*α, tumor necrosis factor-alpha.

Table 6 Other SNPs recorded and SNPs’ association effect

| Gene | ID variation | Analysis | Ref | Pop | Age* | Sport | Level | Intervention | Significance of the SNP effect on the outcomes | Risk of bias** |
| --- | --- | --- | --- | --- | --- | --- | --- | --- | --- | --- |
| ACE ACTN3 AMPD1 CKM MYLK MYLKª | *I/D rs1815739 rs17602729 rs8111989 rs2700352 rs28497577* | Injury | [79] | 161 ♂ | 26.4 | Football | Elite | One season of training and competitions follow-up involved muscle tears in the lower limb | Injury incidence: low total genetic score > high total genetic score | 1 |
| ACE ACTN3 CKM IGF2 IL6 MYLK TNFª | *I/D rs1815739 rs1803285 rs3213221 rs1800795 rs28497577 rs1800629* | Biological | [78] | 19 ♂ 3 ♀ | Low CK responders: 36.4 High CK responders: 35 | Triathlon | Trained | 1.9 km of swimming, 75 km of cycling, and 21.1 km of running | CK: lower total genetic score > higher total genetic score Mb: lower total genetic score > higher total genetic score Total genetic score: low CK responders > high CK responders Individual SNP score in low *vs*. high CK responders: ∅ except ACTN3: low responders > high responders | 1 |
| ACE ACTN3 COL5A1 MCT1ª | *I/D rs1815739 rs12722 rs1049434* | Injury | [15] | 64 ♂ | 23.1 | Football | Elite | 10 years of training and competitions follow-up | Injury incidence: low score > high score Injury severity: ∅ | 1 |
| CCDC73b | *rs78405694* | Injury | [106] | 1125 ♂ 303 ♀ | Injured: 21.3 Control: 20.5 | Track and field and football | Trained | Injury history determined by questionnaire | Injury incidence: ∅ | 1 |
| COL5A1 COL5A1ª | *rs12722 rs3196378* | Biological | [43] | 44 ♂ | 19 | Football | Elite | 45 min of training consisting of five stations with intermittent exercises | The combination of genotypes explain 22 % of IL6 variation | 1 |
| COL1A1 IGF1ª | *rs1800012 rs35767* | Biological | [43] | 44 ♂ | 19 | Football | Elite | 45 min of training consisting of five stations with intermittent exercises | The combination of genotypes explain 40 % of TNFα variation | 1 |
| HP GSTM1 GSTT1ª | *16q22.1 1p13.3 22q11.2* | Biological | [87] | 82 ♂ 53 ♀ | 15 – 19: 17 % 20 – 40: 61.5 % 41 – 58: 21.5 % | No data | Trained | Free choice of running distance (4–21 km) | Higher CK value: Hp 1F-1S and GST M1 + T1 + Lower CK value: Hp 1F-1F/GST M1 + T1 + | 3 |
| MMP3 TNC IL6 NOS3 HIF1Aª | *rs679620 rs2104772 rs1800795 rs1799983 rs11549465* | Injury | [14] | 107 ♂ | 20 | Football | Elite | Six seasons of training and competitions, hamstring injuries follow-up | Injury incidence: higher for MMP3 *AA*, TNC *AA*, IL6 *GG*, NOS3 *GG*, and HIF1A *CC* genotypes | 1 |
| MTHFR  MTHFRb | *rs1801131 rs1801133* | Biological | [95] | 28 ♂ | 25.1 | Water Polo | Elite | Friendly match of 90 min | CK: *CT-AC / TT-AA > CC-AA / CC-AC / CC-CC / CT-AA* LDH: ∅ Mb: ∅ Troponin: ∅ | 2 |
| No datab | *rs12807854* | Injury | [106] | 1125 ♂ 303 ♀ | Injured: 21.3 Control: 20.5 | Track and field and football | Trained | Injury history determined by questionnaire | Injury incidence: *CC-CT > TT* | 1 |

**,* on mean or range in years; ***,* *1* low, *2* moderate, *3* high; *∅,* non-significant effect; CK,creatine kinase; *IL,* interleukin; *LDH,* lactate dehydrogenase; *Mb,* Myoglobin*; Pop,* population; *Ref,* reference; *TNF*α,tumor necrosis factor-alpha;ª, SNPs association analysis; b, SNPs associated with passive muscle stiffness of the biceps femoris long head.

Table 7 Candidate SNPs associated with high genetic risk of NCMI and EIMD

| Gene | ID variation | Effect on NCMI and EIMD | Ref |
| --- | --- | --- | --- |
| ACE | *I/D* | CK: *II > DD*  Injury incidence: *II > DD* | [15,36–38] |
| ACTN3 | *rs1815739* | Injury incidence: *XX > RR* | [12,15,21,69] |
| COL5A1 | *rs12722* | IL6: *TT > TC-CC*  Injury incidence: *TT > TC* | [15,43] |
| MYLK | *rs2700352* | CK: *TT > CC-CT*  Injury severity: *TT > CC-CT* | [14,16] |
| IGF2 | *rs3213221* | CK: *GG > CC*  Injury severity: *GG-CC > GC*  Injury incidence: *GG > CC-CG* among hispanics | [19,44–46] |

*CK,* creatine kinase; *EIMD,* exercise-induced muscle damage; *IL6,* interleukin 6; *Mb,* myoglobin; *NCMI,* non-contact muscle injury; *Ref,* reference.
